# Supplementary material for: Acceptability and feasibility of community-based provision of urine pregnancy tests to support linkages to reproductive health services in Western Kenya: a qualitative analysis
Source: Springer Nature journal article supplement (doi:10.1186/s12884-022-04869-8), 2022-09-01
Supplement: MOESM1 [file 23441844]

## Additional File 1

### Pre-intervention focus group discussion guide for Community Health Volunteers (Kiswahili)

#### Pre Intervention Focus Group Guide – Madaktari wa vijiji

- **Swali la kuchunguza:** Je! Ni jinsi gani Madaktari wa vijiji wanaweza kuwasaidia wanawake kutambua mimba na kuwasaidia kupata huduma za afya?

Vidokezo: \_\_\_\_\_  
\_\_\_\_\_  
\_\_\_\_\_  
\_\_\_\_\_

- **Maswali ya kufuatilia:** Ungejisikia vizuri kupeana vifaa vya kupima ujauzito?

Vidokezo: \_\_\_\_\_  
\_\_\_\_\_  
\_\_\_\_\_  
\_\_\_\_\_

- Je! Kutakua na faida gani kutokana na kupeana vifaa vya kupima ujauzito ?

Vidokezo: \_\_\_\_\_  
\_\_\_\_\_  
\_\_\_\_\_  
\_\_\_\_\_

- Je! Ni ugumu gani unaoweza kukumbuna nao katika kupeana vifaa vya kupima ujauzito?

Vidokezo: \_\_\_\_\_  
\_\_\_\_\_  
\_\_\_\_\_  
\_\_\_\_\_

- Je! Ni mafunzo gani ya ziada ambayo yanaweza kukusaidia kupeana vifaa?

Vidokezo: \_\_\_\_\_  
\_\_\_\_\_  
\_\_\_\_\_  
\_\_\_\_\_

## Additional File 1

### Pre-intervention focus group discussion guide for Community Health Volunteers (Kiswahili)

- **Swali la uchunguzi:** Je! Ungejisikia vizuri kuwashauri wanawake kuhusu nini cha kufanya ikiwa watapimwa na matekeo kuonyesha kuwa wana ujauzito?

**Vidokezo:** \_\_\_\_\_  
\_\_\_\_\_  
\_\_\_\_\_  
\_\_\_\_\_

- **Swali la kufuatilia:** Je! Ungewashauri vipi wanawake ikiwa matekeo yao yangeonyesha kuwa wana ujauzito?

**Vidokezo:** \_\_\_\_\_  
\_\_\_\_\_  
\_\_\_\_\_  
\_\_\_\_\_

Je, ungewauliza vipi jinsi walivyohisi kuhusu kuwa mjamzito?

**Vidokezo:** \_\_\_\_\_  
\_\_\_\_\_  
\_\_\_\_\_  
\_\_\_\_\_

Je! Ungewashauri vipi ikiwa hawakufurahishwa na ujauzito huo?

**Vidokezo:** \_\_\_\_\_  
\_\_\_\_\_  
\_\_\_\_\_  
\_\_\_\_\_

Je! Ungewaelekeza wapi iwapo matokeo ya yangeonyesha kua wana ujauzito?

**Vidokezo:** \_\_\_\_\_  
\_\_\_\_\_  
\_\_\_\_\_  
\_\_\_\_\_

Je! Ni mafunzo gani ya ziada yanaweza kukusaidia kutoa ushauri kuhusu matekeo ambayo yanaonyesha kuwa kuna ujauzito?

## Additional File 1

### Pre-intervention focus group discussion guide for Community Health Volunteers (Kiswahili)

- **Vidokezo:** \_\_\_\_\_  
\_\_\_\_\_  
\_\_\_\_\_  
\_\_\_\_\_

- **Swali la kuchunguza:** Je! Ungejisikia vizuri kuwashauri wanawake kuhusu nini cha kufanya ikiwa matokeo yangeonyesha kuwa hawana ujauzito?

**Vidokezo:** \_\_\_\_\_  
\_\_\_\_\_  
\_\_\_\_\_  
\_\_\_\_\_

- **Swali la kufuatilia:** Je! Ungewashauri vipi wanawake ikiwa matokeo yao yangeonyesha kuwa hawana ujauzito?

**Vidokezo:** \_\_\_\_\_  
\_\_\_\_\_  
\_\_\_\_\_  
\_\_\_\_\_

Je! Ungewauliza vipi jinsi walivyohisi kuhusu kutokuwa na ujauzito?

**Vidokezo:** \_\_\_\_\_  
\_\_\_\_\_  
\_\_\_\_\_  
\_\_\_\_\_

Je! Ungewashauri vipi ikiwa hawataki kuwa na mimba?

**Vidokezo:** \_\_\_\_\_  
\_\_\_\_\_  
\_\_\_\_\_  
\_\_\_\_\_

Je! Ungejisikia vizuri kuwashauri wanawake kuhusu kutumia mbinu ya kupanga uzazi?

**Vidokezo:** \_\_\_\_\_  
\_\_\_\_\_

## Additional File 1

### Pre-intervention focus group discussion guide for Community Health Volunteers (Kiswahili)

---

---

---

Je! Ungewaelekeza wapi kama wangetaka kutumia mbinu ya kupanga uzazi?

**Vidokezo:** \_\_\_\_\_

---

---

---

Je! Ungewashauri vipi kama wangetaka kuwa na ujauzito?

**Vidokezo:** \_\_\_\_\_

---

---

---

Ungewaelekeza wapi kama wangetaka kuwa na ujauzito?

**Vidokezo:** \_\_\_\_\_

---

---

---

Je! Ni mafunzo gani ya ziada ambayo yanaweza kukusaidia kutoa ushauri nasaha kwa matokeo ambayo yanaonyesha kuwa hana ujauzito?

**Vidokezo:** \_\_\_\_\_

---

---

---

Je! Unafikiria nini kuhusu kuwapa wanawake nambari ya simu ili wapate ushauri wa kibinafsi kupitia ujumbe au kupigiwa simu?

- **Vidokezo:** \_\_\_\_\_

---

---

---

- **Swali ya kumalizia:** Je! Kuna kitu kingine chochote unachotaka tujue kuhusu kupeana vifaa vya kupima ujauzito ?

## Additional File 1

### Pre-intervention focus group discussion guide for Community Health Volunteers (Kiswahili)

**Vidokezo:** \_\_\_\_\_  
\_\_\_\_\_  
\_\_\_\_\_  
\_\_\_\_\_

Je! Kuna kitu kingine chochote unachotaka tujue kuhusu kutoa ushauri nasaha na rufaa kwa wanawake ambao ni wajawazito?

**Vidokezo:** \_\_\_\_\_  
\_\_\_\_\_  
\_\_\_\_\_  
\_\_\_\_\_

Je! Kuna kitu kingine chochote unachotaka tujue kuhusu kutoa ushauri nasaha na rufaa kwa wanawake amabao si wajawazito?

**Vidokezo:** \_\_\_\_\_  
\_\_\_\_\_  
\_\_\_\_\_  
\_\_\_\_\_

## Additional File 1

### Pre-intervention focus group discussion guide for women (Kiswahili)

#### Pre Intervention Focus Group Guide – Wanawake

- **Swali la kuchunguzi:** Unajuaje unapokuwa mjamzito?

- **Vidokezo:** \_\_\_\_\_  
\_\_\_\_\_  
\_\_\_\_\_  
\_\_\_\_\_

- **Swali la kufuatilia:** Je! Ni wakati gani unaweza kutumia vifaa vya kupima ujauzito?

- **Vidokezo:** \_\_\_\_\_  
\_\_\_\_\_  
\_\_\_\_\_  
\_\_\_\_\_

Je! Ungeipata wapi?

- **Vidokezo:** \_\_\_\_\_  
\_\_\_\_\_  
\_\_\_\_\_  
\_\_\_\_\_

Je! Una matatizo gani katika kupata au kutumia vifaa ivyo?

**Vidokezo:** \_\_\_\_\_  
\_\_\_\_\_  
\_\_\_\_\_  
\_\_\_\_\_

Una maoni gani kuhusu kuipata kutoka kwa madaktari wa vijiji?

**Vidokezo:** \_\_\_\_\_  
\_\_\_\_\_  
\_\_\_\_\_  
\_\_\_\_\_

Je! Kuna faida gani kuipata kutoka kwa madaktari wa vijiji?

**Vidokezo:** \_\_\_\_\_  
\_\_\_\_\_  
\_\_\_\_\_  
\_\_\_\_\_

Je, ni vikwazo gani vya kupata kutoka kwa madaktari wa vijiji?

## Additional File 1

### Pre-intervention focus group discussion guide for women (Kiswahili)

- **Vidokezo:** \_\_\_\_\_  
\_\_\_\_\_  
\_\_\_\_\_  
\_\_\_\_\_
- **Swali la kuchunguza:** Unajauje cha kufanya iwapi matokeo yataonyesha kuwa una ujauzito?

**Vidokezo:** \_\_\_\_\_  
\_\_\_\_\_  
\_\_\_\_\_  
\_\_\_\_\_

- **Swali la kufuatilia:** Ungeenda wapi ikiwa matokeo yangeonyesha kuwa una ujauzito?
- **Vidokezo:** \_\_\_\_\_  
\_\_\_\_\_  
\_\_\_\_\_  
\_\_\_\_\_

Ungefanya nini ikiwa huna furaha kuhusu kuwa mjamzito?

**Vidokezo:** \_\_\_\_\_  
\_\_\_\_\_  
\_\_\_\_\_  
\_\_\_\_\_

Je, ni wakati gani wa ujauzito unaweza kwenda kwenye kituo cha afya?

**Vidokezo:** \_\_\_\_\_  
\_\_\_\_\_  
\_\_\_\_\_  
\_\_\_\_\_

Je, ni faida gani za kwenda kliniki ya ujauzito mapema katika ujauzito wako?

**Vidokezo:** \_\_\_\_\_  
\_\_\_\_\_  
\_\_\_\_\_  
\_\_\_\_\_

Una maoni gani kuhusu kupata ushauri nasaha na rufaa kutoka kwa daktari wa kijiji?

## Additional File 1

### Pre-intervention focus group discussion guide for women (Kiswahili)

**Vidokezo:** \_\_\_\_\_  
\_\_\_\_\_  
\_\_\_\_\_  
\_\_\_\_\_

Una maoni gani kuhusu kupata ushauri wa kipekee na rufaa kupitia kwa ujumbe au kupigiwa simu?

- **Vidokezo:** \_\_\_\_\_  
\_\_\_\_\_  
\_\_\_\_\_  
\_\_\_\_\_

- **Swali la kuchunguza:** Ungefanya nini ikiwa kipimo kilionyesha hauna ujauzito na pia haukua unataka kua mjamzito?

- **Vidokezo:** \_\_\_\_\_  
\_\_\_\_\_  
\_\_\_\_\_  
\_\_\_\_\_

- **Swali la kufuatilia:** Je! Ungetafuta mbinu ya kupanga uzazi?

**Vidokezo:** \_\_\_\_\_  
\_\_\_\_\_  
\_\_\_\_\_  
\_\_\_\_\_  
\_\_\_\_\_

Je! Ungetafuta mbinu ya kupanga uzazi wapi?

**Vidokezo:** \_\_\_\_\_  
\_\_\_\_\_  
\_\_\_\_\_  
\_\_\_\_\_

Je! Ungekumbana na matatizo gani katika kupata mbinu za kupanga uzazi?

**Vidokezo:** \_\_\_\_\_  
\_\_\_\_\_  
\_\_\_\_\_  
\_\_\_\_\_



## Additional File 1

### Pre-intervention focus group discussion guide for women (Kiswahili)

Una maoni gani kuhusu kupata ushauri nasaha na rufaa ya kliniki ya kupanga uzazi kutoka kwa daktari wa kijiji?

**Vidokezo:** \_\_\_\_\_  
\_\_\_\_\_  
\_\_\_\_\_  
\_\_\_\_\_

Una maoni gani kuhusu kupata ushauri nasaha na rufaa kupitia ujumbe ama kupigiwa simu?

- **Vidokezo:** \_\_\_\_\_  
\_\_\_\_\_  
\_\_\_\_\_  
\_\_\_\_\_

- **Maswali ya kumalizia:** Je! Kuna kitu kingine chochote unachotaka unachotaka tujue kuhusu kupokea vifaa vya kupima ujauzito kutoka kwa daktari wa kijiji?

- **Vidokezo:** \_\_\_\_\_  
\_\_\_\_\_  
\_\_\_\_\_  
\_\_\_\_\_

Je! Kuna kitu chochote unachotaka tujue kuhusu kupokea ushauri nasaha na rufaa kutoka kwa madaktari wa vijiji?

**Vidokezo:** \_\_\_\_\_  
\_\_\_\_\_  
\_\_\_\_\_  
\_\_\_\_\_

Je! Kuna kitu kingine chochote unachotaka tujue kuhusu kupokea ushauri nasaha na rufaa kupitia kwa njia ya ujumbe au simu ya faragha?

**Vidokezo:** \_\_\_\_\_  
\_\_\_\_\_  
\_\_\_\_\_  
\_\_\_\_\_

## Additional File 1

### Pre-intervention focus group discussion guide for men (Kiswahili)

#### Pre Intervention Focus Group Guide – Wanaume

- **Swali la kuchunguza:** Unajuaje mkeo akiwa mjamzito?

- **Vidokezo:** \_\_\_\_\_  
\_\_\_\_\_  
\_\_\_\_\_  
\_\_\_\_\_

- **Maswali ya kufuatilia:** Je! Unajua kifaa cha kupima ujauzito ni nini?

- **Vidokezo:** \_\_\_\_\_  
\_\_\_\_\_  
\_\_\_\_\_  
\_\_\_\_\_

- Je! Mke wako uwa anatumia kifaa cha kupima ujauzito ?

**Vidokezo:** \_\_\_\_\_  
\_\_\_\_\_  
\_\_\_\_\_  
\_\_\_\_\_

- (Iwapo ndio) Je! Uwa anatumia wakati gani kifaa cha kupima ujauzito?  
Na ni sababu gani ungemfanya kutumia kifaa iki?

**Vidokezo:** \_\_\_\_\_  
\_\_\_\_\_  
\_\_\_\_\_  
\_\_\_\_\_

(Iwapo La) Ni kwa nini hasitumie kifaa iki?

**Vidokezo:** \_\_\_\_\_  
\_\_\_\_\_  
\_\_\_\_\_  
\_\_\_\_\_

Je! Una maoni gani kuhusu matumizi ya kifaa cha kupima ujauzito?

## Additional File 1

### Pre-intervention focus group discussion guide for men (Kiswahili)

**Vidokezo:** \_\_\_\_\_  
\_\_\_\_\_  
\_\_\_\_\_  
\_\_\_\_\_

Je! Ni nini mtazamo wa wanaume katika jamii hii kuhusu madaktari wa vijiji?

**Vidokezo:** \_\_\_\_\_  
\_\_\_\_\_  
\_\_\_\_\_  
\_\_\_\_\_

Je! wanaume kutoka hii jamii wana maoni gani kuhusu madaktari wa vijiji kuwapa huduma kwa wanawake wao?

**Vidokezo:** \_\_\_\_\_  
\_\_\_\_\_  
\_\_\_\_\_  
\_\_\_\_\_

Je! Wanaume katika jamii hii wana maoni gani kuhusu madaktari wa vijiji au wahudumu wa afya kuhusu suala la usiri wakati wa kutoa huduma kwa wake zao na wanajamii?

**Vidokezo:** \_\_\_\_\_  
\_\_\_\_\_  
\_\_\_\_\_  
\_\_\_\_\_

Je! Unapata faida gani kutoka kwa madaktari wa vijiji?

**Vidokezo:** \_\_\_\_\_  
\_\_\_\_\_  
\_\_\_\_\_  
\_\_\_\_\_

Je! Una matatizo gani na madaktari wa vijiji?

**Vidokezo:** \_\_\_\_\_  
\_\_\_\_\_  
\_\_\_\_\_  
\_\_\_\_\_

Je! Ni faida gani za kupata kifaa ya kupima ujauzito kutumia mkojo kutoka kwa daktari wa kijiji?

## Additional File 1

### Pre-intervention focus group discussion guide for men (Kiswahili)

**Vidokezo:** \_\_\_\_\_  
\_\_\_\_\_  
\_\_\_\_\_  
\_\_\_\_\_

Je! Ni vikwazo gani ambayo inatokana na kupata kutoka kwa daktari wa kijiji?

**Vidokezo:** \_\_\_\_\_  
\_\_\_\_\_  
\_\_\_\_\_  
\_\_\_\_\_

Je! Unaweza kufikiria kumnunulia mkeo kifaa ya kupimia ujauzito ?

**Vidokezo:** \_\_\_\_\_  
\_\_\_\_\_  
\_\_\_\_\_  
\_\_\_\_\_

Ni wapi utanunua au kupata kifaa ya kupimia ujauzito ?

**Vidokezo:** \_\_\_\_\_  
\_\_\_\_\_  
\_\_\_\_\_  
\_\_\_\_\_

Je! Imani yako ya kidini inaweza kuathiri hisia zako kuhusu upimaji wa ujauzito?

**(Iwapo ndio):** kivipi, au kwa njia zipi? Na katika njia ya kupanga uzazi?

**Vidokezo:** \_\_\_\_\_  
\_\_\_\_\_  
\_\_\_\_\_  
\_\_\_\_\_

Je! Imani yako na mtazamo ya kitamaduni inaweza kuathiri hisia zako kuhusu upimaji wa ujauzito?

**(Iwapo ndio):** kivipi, au kwa njia zipi? Na katika njia ya kupanga uzazi?

## Additional File 1

### Pre-intervention focus group discussion guide for men (Kiswahili)

**Vidokezo:** \_\_\_\_\_

---

---

---

---

- **Swali la kuchunguza:** Je! Ungefanya nini iwapo matokeo ingeonyesha kuwa ana ujauzito? au ungejuaje kitu la kufanya iwapo matokeo ingeonyesha kuwa ana ujauzito?

- **Vidokezo:** \_\_\_\_\_

---

---

---

---

- **Maswali ya kufuatilia:** Je! Ungempeleka wapi iwapo matokeo ingeonyesha kuwa ana ujauzito?

- **Vidokezo:** \_\_\_\_\_

---

---

---

---

Je! Ungempelekeza aende wapi ikiwa kipimo chake cha ujauzito inaonyesha kwamba ana ujauzito?

**Vidokezo:** \_\_\_\_\_

---

---

---

---

Ungefanya nini kama wanandoa ikiwa hamna furaha kuhusu ujauzito?

**Vidokezo:** \_\_\_\_\_

---

---

---

---

Mungeenda wapi? Au mungeenda kwa nani?

**(Iwapo ndio):** Toa sababu

**(Iwapi La ):** Toa sababu.

## Additional File 1

### Pre-intervention focus group discussion guide for men (Kiswahili)

**Vidokezo:** \_\_\_\_\_  
\_\_\_\_\_  
\_\_\_\_\_  
\_\_\_\_\_

Ungeenda wapi kwa huduma za utunzaji wa ujauzito (ANC)?

**Vidokezo:** \_\_\_\_\_  
\_\_\_\_\_  
\_\_\_\_\_  
\_\_\_\_\_

Je! Ni ugumu gani ambazo zipo katika kupata huduma za utunzaji wa ujauzito?

**Vidokezo:** \_\_\_\_\_  
\_\_\_\_\_  
\_\_\_\_\_  
\_\_\_\_\_

Faida gani zipo katika kupata huduma za utunzaji wa ujauzito?

**Vidokezo:** \_\_\_\_\_  
\_\_\_\_\_  
\_\_\_\_\_  
\_\_\_\_\_

Je! Ni baadhi ya matatizo gani yanayowakabili wanawake wakati wa ujauzito?

**Vidokezo:** \_\_\_\_\_  
\_\_\_\_\_  
\_\_\_\_\_  
\_\_\_\_\_

Je! Ikiwa matokeo inaonyesha kuwa hauna ujauzito...na hutaki mtoto mwingine? Ungeenda wapi au ungefanya nini? Au hutaki mtoto mwingine?

• **Vidokezo:** \_\_\_\_\_  
\_\_\_\_\_

## Additional File 1

### Pre-intervention focus group discussion guide for men (Kiswahili)

---

---

---

- **Swali la kuchunguza:** Je! Una maoni gani kuhusu njia za kupanga uzazi na matumizi yake?

- **Vidokezo:** \_\_\_\_\_

---

---

---

- **Maswali ya kufuatilia:** Je! Ni faida gani za kutumia njia za kupanga uzazi?

- **Vidokezo:** \_\_\_\_\_

---

---

---

Je! Ni vikwazo uha hatari gani za kutumia njia za kupanga uzazi?

- Vidokezo:** \_\_\_\_\_

---

---

---

Je! Una hisia gani kuhusu mke wako kutumia njia ya kupanga uzazi?

- Vidokezo:** \_\_\_\_\_

---

---

---

Je! Wanaume katika jamii yako wana maoni gani kuhusu mbinu mahususi za kupanga uzazi? (vipandikizi, IUCDs, Depo, kondomu, BTL)

- Vidokezo:** \_\_\_\_\_

---

---

---

- **Swali la kuchunguza:** Je! Unaweza kuambatana na mke wako kwenda kliniki?

- **Vidokezo:** \_\_\_\_\_

---

---

---

---

## Additional File 1

### Pre-intervention focus group discussion guide for men (Kiswahili)

- **Maswali ya kufuatilia:** Faida zake ni zipi?

- **Vidokezo:** \_\_\_\_\_  
\_\_\_\_\_  
\_\_\_\_\_  
\_\_\_\_\_

Vikwazo vingekuwa vipi?

- **Vidokezo:** \_\_\_\_\_  
\_\_\_\_\_  
\_\_\_\_\_  
\_\_\_\_\_

- **Swali la kuchunguza:** Je! Wana maoni gani kuhusu ushauri wa madaktari wa vijiji?

- **Vidokezo:** \_\_\_\_\_  
\_\_\_\_\_  
\_\_\_\_\_  
\_\_\_\_\_

- **Maswali ya kufuatilia:** Je! Wana maoni gani kuhusu ushauri nasaha unaotegemea simu?

- **Vidokezo:** \_\_\_\_\_  
\_\_\_\_\_  
\_\_\_\_\_  
\_\_\_\_\_

Je! Kuna kitu kingine chochote unachotaka tufahamu kuhusu kupima ujauzito kwenye mkojo, matumizi yake na madaktari wa vijiji kuwapa wake zenu?

- **Vidokezo:** \_\_\_\_\_  
\_\_\_\_\_  
\_\_\_\_\_  
\_\_\_\_\_

- **Maswali ya kumaliza:** Eleza uingiliaji kati tunaopanga (Kupima ujauzito )-Uliza ni nini maoni yao kuhusiana na mradi huu?

- Vidokezo:** \_\_\_\_\_  
\_\_\_\_\_  
\_\_\_\_\_  
\_\_\_\_\_

Faida ya huu mradi ni zipi?

- Vidokezo:** \_\_\_\_\_  
\_\_\_\_\_



## Additional File 1

### Pre-intervention focus group discussion guide for men (Kiswahili)

---

---

---

Hatari au vikwazo ni gani?

**Vidokezo:** \_\_\_\_\_

---

---

---

---

Je! Tunapaswa kuondoa nini kutoka kwa huu mradi?

**Vidokezo:** \_\_\_\_\_

---

---

---

---

Je! Ni mapendekezo gani yako kwa huu mradi katika siku zijazo?

**Vidokezo:** \_\_\_\_\_

---

---

---

---

## Additional File 1

### Post-intervention focus group discussion guide for Community Health Volunteers (Kiswahili)

#### Post Intervention Focus Group Guide – Madaktari wa Vijiji

- **Swali la kuchunguza:** Je! uzoefu wako ulikuwa vipi katika kutoa vifaa vya kupima ujauzito ?

• **Vidokezo:** \_\_\_\_\_  
\_\_\_\_\_  
\_\_\_\_\_  
\_\_\_\_\_

- **Maswali ya kutuatilia:** Ulijisikia raha kiasi gani kutoa vifaa vya kupima ujauzito? \_\_\_\_\_

\_\_\_\_\_  
\_\_\_\_\_  
\_\_\_\_\_

Je! baadhi ya mifano ya wakati ulijisikia vibaya ni gani (au haukujisikia vizuri) kutoa vifaa vya kupima ujauzito?

**Vidokezo:** \_\_\_\_\_  
\_\_\_\_\_  
\_\_\_\_\_  
\_\_\_\_\_

Je! Unafikiri ni kwa nini hakukuwa na washiriki walioripoti kubakwa?

**Vidokezo:** \_\_\_\_\_  
\_\_\_\_\_  
\_\_\_\_\_  
\_\_\_\_\_

Je, ulipata faida gani kwa kupeana vifaa vya kupima ujauzito ?

**Vidokezo:** \_\_\_\_\_  
\_\_\_\_\_  
\_\_\_\_\_  
\_\_\_\_\_

Wanawake walipata faida gani?

**Vidokezo:** \_\_\_\_\_  
\_\_\_\_\_  
\_\_\_\_\_  
\_\_\_\_\_

Je! ni matatizo gani ulikumbana nayo katika kutoa vifaa vya kupima ujauzito ?

## Additional File 1

### Post-intervention focus group discussion guide for Community Health Volunteers (Kiswahili)

**Vidokezo:** \_\_\_\_\_  
\_\_\_\_\_  
\_\_\_\_\_  
\_\_\_\_\_

Wanawake walikabili matatizo gani?

**Vidokezo:** \_\_\_\_\_  
\_\_\_\_\_  
\_\_\_\_\_  
\_\_\_\_\_

Je, ungependa kuendelea kutoa vifaa vya kupima ujauzito kwenye mkojo? Kwa nini ndio au kwa nini la?

- **Vidokezo:** \_\_\_\_\_  
\_\_\_\_\_  
\_\_\_\_\_
- **Probe Question:** Uzoefu wako ulikuwa vipi katika kushauri na rufaa kwa wanawake kuhusu nini cha kufanya ikiwa vipimo vyao yangeonyesha kuwa wana ujauzito?
- **Vidokezo:** \_\_\_\_\_  
\_\_\_\_\_  
\_\_\_\_\_
- **Follow-up Questions:** Ulijisikia raha kiasi gani kuhusu ushauri na rufaa kwa wanawake ambao vipimo vyao ingeonyesha kuwa wana ujauzito?

**Vidokezo:** \_\_\_\_\_  
\_\_\_\_\_  
\_\_\_\_\_  
\_\_\_\_\_

Ulijisikia raha kiasi gani kushauri na kuwapa rufaa wanawake ambao hawakufurahishwa na kuwa wajawazito?

**Vidokezo:** \_\_\_\_\_  
\_\_\_\_\_  
\_\_\_\_\_  
\_\_\_\_\_

## Additional File 1

### Post-intervention focus group discussion guide for Community Health Volunteers (Kiswahili)

Je, uzoefu wako wa ushauri na ushauri na rufaa kwa wanawake ambao walisema walitaka uavyaji mimba ulikuwaje?

**Vidokezo:** \_\_\_\_\_  
\_\_\_\_\_  
\_\_\_\_\_  
\_\_\_\_\_

Je! ni faida gani ulizopata katika kutoa ushauri na kuwaelekeza wanawake ambao vipimo vyao ilionyesha kuwa wana ujauzito?

**Vidokezo:** \_\_\_\_\_  
\_\_\_\_\_  
\_\_\_\_\_  
\_\_\_\_\_

Wanawake walipata faida gani?

**Vidokezo:** \_\_\_\_\_  
\_\_\_\_\_  
\_\_\_\_\_  
\_\_\_\_\_

Je! ni matatizo gani ulikumbana nayo katika kutoa ushauri nasaha na rufaa kwa wanawake ambao vipimo vyao ilionyesha kuwa wana ujauzito?

**Vidokezo:** \_\_\_\_\_  
\_\_\_\_\_  
\_\_\_\_\_  
\_\_\_\_\_

Wanawake hao walikabili matatizo gani?

**Vidokezo:** \_\_\_\_\_  
\_\_\_\_\_  
\_\_\_\_\_  
\_\_\_\_\_

Je! ungependa kuendelea kutoa ushauri na rufaa kwa wanawake ambao vipimo vyao yanaonyesha kuwa wana ujauzito?

• **Vidokezo:** \_\_\_\_\_  
\_\_\_\_\_  
\_\_\_\_\_

## Additional File 1

### Post-intervention focus group discussion guide for Community Health Volunteers (Kiswahili)

- 
- 
- **Swali la kuchunguza:** Uzoefu wako ulikuwa vipi katika kushauri na kuwapa rufaa wanawake kuhusu nini cha kufanya ikiwa vipimo vyao inaonyesha kuwa hawana ujauzito?

- **Vidokezo:** \_\_\_\_\_

---

---

---

---

---

- **Maswali ya kufuatilia:** Ulijisikia raha kiasi gani kuhusu ushauri na kuwapa rufaa wanawake kuhusu nini cha kufanya ikiwa matokeo yao yangeonyesha kuwa hawana ujauzito?

**Vidokezo:** \_\_\_\_\_

---

---

---

---

---

Je, ulijisikia raha kiasi gani kupata ushauri na kuwaelekeza wanawake ambao hawakutaka kuwa wajawazito?

**Vidokezo:** \_\_\_\_\_

---

---

---

---

---

Je, ulijisikia raha kiasi gani kupeana ushauri na kuwaelekeza wanawake waliotaka kuwa wajawazito?

**Vidokezo:** \_\_\_\_\_

---

---

---

---

---

Je, ulipata faida gani katika kutoa ushauri na kuwaelekeza wanawake ambao vipimo vyao vilionyesha kuwa hawana ujauzito?

**Vidokezo:** \_\_\_\_\_

---

---

---

---

---

Wanawake walipata faida gani?

## Additional File 1

### Post-intervention focus group discussion guide for Community Health Volunteers (Kiswahili)

**Vidokezo:** \_\_\_\_\_  
\_\_\_\_\_  
\_\_\_\_\_  
\_\_\_\_\_

Je! ni matatizo gani ulikumbana nayo katika kutoa ushauri na rufaa kwa wanawake ambao vipimo vyao vilionyesha kuwa hawana ujauzito?

**Vidokezo:** \_\_\_\_\_  
\_\_\_\_\_  
\_\_\_\_\_  
\_\_\_\_\_

Wanawake hao walikabili matatizo gani?

**Vidokezo:** \_\_\_\_\_  
\_\_\_\_\_  
\_\_\_\_\_  
\_\_\_\_\_

Je! ungependa kuendelea kutoa ushauri na rufaa kwa wanawake ambao vipimo vyao vimeonyesha kuwa hawana ujauzito?

- **Vidokezo:** \_\_\_\_\_  
\_\_\_\_\_  
\_\_\_\_\_  
\_\_\_\_\_

- **Swali la kuchunguza:** Je! Kuna wakati ambapo hukutoa ushauri ya baada ya matokeo ya kupimwa na rufaa?

**Vidokezo:** \_\_\_\_\_  
\_\_\_\_\_  
\_\_\_\_\_  
\_\_\_\_\_

- **Maswali ya kufuatilia:** Ni ipi baadhi ya mifano ya lini na kwa nini hukutoa ushauri wa baada ya matokeo ya kupimwa?

**Vidokezo:** \_\_\_\_\_  
\_\_\_\_\_  
\_\_\_\_\_  
\_\_\_\_\_

## Additional File 1

### Post-intervention focus group discussion guide for Community Health Volunteers (Kiswahili)

Je, uliwapaje wanawake chaguo la ushauri nasaha kwa njia ya simu?

**Vidokezo:** \_\_\_\_\_  
\_\_\_\_\_  
\_\_\_\_\_  
\_\_\_\_\_

Unadhani ni kwa nini washiriki walichagua ushauri kwa njia ya simu?

**Vidokezo:** \_\_\_\_\_  
\_\_\_\_\_  
\_\_\_\_\_  
\_\_\_\_\_

Je! Unafikiri ni kwa nini wanawake waliochagua ushauri kwa njia ya simu hawakuwahi kuwasiliana na msaidizi wa utafiti? Je, uliwapatia kadi ili wawasiliane na msaidizi wa utafiti?

**Vidokezo:** \_\_\_\_\_  
\_\_\_\_\_  
\_\_\_\_\_  
\_\_\_\_\_

Je, ulihisi kuwa walihitaji ushauri nasaha unaotegemea daktari wa kijiji pamoja na ushauri wao wa kutegemea simu?

• **Vidokezo:** \_\_\_\_\_  
\_\_\_\_\_  
\_\_\_\_\_  
\_\_\_\_\_

- **Maswali ya kumalizia:** Je! kuna kitu kingine chochote unachotaka tujue kuhusu jinsi ya kubadilisha kuboresha njia ya kutoa vifaa vya kupima ujauzito katika siku zijazo?

**Vidokezo:** \_\_\_\_\_  
\_\_\_\_\_  
\_\_\_\_\_  
\_\_\_\_\_

Je, kuna kitu kingine chochote unachotaka tujue kuhusu jinsi ya kubadilisha au kuboresha mchakato wa kutoa ushauri na rufaa kwa wanawake ambao ni wajawazito katika siku zijazo?

**Vidokezo:** \_\_\_\_\_  
\_\_\_\_\_  
\_\_\_\_\_

## Additional File 1

### Post-intervention focus group discussion guide for Community Health Volunteers (Kiswahili)

---

---

Je! kuna kitu kingine chochote unachotaka tujue kuhusu jinsi ya kubadilisha au kuboresha mchakato wa kutoa ushauri nasaha na rufaa kwa wanawake ambao si wajawazito katika siku zijazo?

**Vidokezo:** \_\_\_\_\_  
\_\_\_\_\_  
\_\_\_\_\_  
\_\_\_\_\_



## Additional File 1

### Pre-intervention focus group discussion guide for Community Health Volunteers (English)

#### Pre Intervention Focus Group Guide – Community Health Volunteers

- **Probe Question:** How can CHVs help women identify pregnancies and help them get care?

**Notes:** \_\_\_\_\_  
\_\_\_\_\_  
\_\_\_\_\_  
\_\_\_\_\_

- **Follow-up Questions:** Would you feel comfortable providing urine pregnancy kits?

**Notes:** \_\_\_\_\_  
\_\_\_\_\_  
\_\_\_\_\_  
\_\_\_\_\_

What benefits would there be from providing urine pregnant kits?

**Notes:** \_\_\_\_\_  
\_\_\_\_\_  
\_\_\_\_\_  
\_\_\_\_\_

What difficulties would you face in providing urine pregnancy kits?

**Notes:** \_\_\_\_\_  
\_\_\_\_\_  
\_\_\_\_\_  
\_\_\_\_\_

What additional training would be helpful for you to provide kits?

**Notes:** \_\_\_\_\_  
\_\_\_\_\_  
\_\_\_\_\_  
\_\_\_\_\_

- **Probe Question:** Would you feel comfortable counselling women about what to do if they have a positive pregnant test?

**Notes:** \_\_\_\_\_  
\_\_\_\_\_  
\_\_\_\_\_

## Additional File 1

### Pre-intervention focus group discussion guide for Community Health Volunteers (English)

---

---

- **Follow-up Questions:** How would you counsel women if they had a positive pregnancy test?

**Notes:** \_\_\_\_\_

---

---

---

---

How would you ask them how they felt about being pregnant?

**Notes:** \_\_\_\_\_

---

---

---

---

How would you counsel them if they were unhappy about being pregnant?

**Notes:** \_\_\_\_\_

---

---

---

---

Where would you refer them if they have a positive pregnant test?

**Notes:** \_\_\_\_\_

---

---

---

---

What additional training would be helpful for you to provide counselling for a positive pregnancy test?

**Notes:** \_\_\_\_\_

---

---

---

---

- **Probe Question:** Would you feel comfortable counselling women about what to do if they have a negative pregnancy test?

## Additional File 1

### Pre-intervention focus group discussion guide for Community Health Volunteers (English)

Notes: \_\_\_\_\_  
\_\_\_\_\_  
\_\_\_\_\_  
\_\_\_\_\_

- **Follow-up Questions:** How would you counsel women if they have a negative pregnancy test?

Notes: \_\_\_\_\_  
\_\_\_\_\_  
\_\_\_\_\_  
\_\_\_\_\_

How would you ask them how they felt about not being pregnant?

Notes: \_\_\_\_\_  
\_\_\_\_\_  
\_\_\_\_\_  
\_\_\_\_\_

How would you counsel them if they did not want to be pregnant?

Notes: \_\_\_\_\_  
\_\_\_\_\_  
\_\_\_\_\_  
\_\_\_\_\_

Would you feel comfortable counselling women about using FP?

Notes: \_\_\_\_\_  
\_\_\_\_\_  
\_\_\_\_\_  
\_\_\_\_\_

Where would you refer them if they wanted to use FP?

Notes: \_\_\_\_\_  
\_\_\_\_\_  
\_\_\_\_\_  
\_\_\_\_\_

How would you counsel them if they wanted to be pregnant?

## Additional File 1

### Pre-intervention focus group discussion guide for Community Health Volunteers (English)

Notes: \_\_\_\_\_  
\_\_\_\_\_  
\_\_\_\_\_  
\_\_\_\_\_

Where would you refer them if they wanted to be pregnant?

Notes: \_\_\_\_\_  
\_\_\_\_\_  
\_\_\_\_\_  
\_\_\_\_\_

What additional training would be helpful for you to provide counselling for a negative pregnancy test?

Notes: \_\_\_\_\_  
\_\_\_\_\_  
\_\_\_\_\_  
\_\_\_\_\_

What would you think about providing women with a phone number for them to receive private counselling by SMS or phone call?

Notes: \_\_\_\_\_  
\_\_\_\_\_  
\_\_\_\_\_  
\_\_\_\_\_

- **Exit Questions:** Is there anything else you want us to know about providing urine pregnancy test kits?

Notes: \_\_\_\_\_  
\_\_\_\_\_  
\_\_\_\_\_  
\_\_\_\_\_

Is there anything else you want us to know about providing counselling and referral for women who are pregnant?

Notes: \_\_\_\_\_  
\_\_\_\_\_  
\_\_\_\_\_  
\_\_\_\_\_

## Additional File 1

### Pre-intervention focus group discussion guide for Community Health Volunteers (English)

Is there anything else you want us to know about providing counselling and referral for women who are not pregnant?

**Notes:** \_\_\_\_\_  
\_\_\_\_\_  
\_\_\_\_\_  
\_\_\_\_\_  
\_\_\_\_\_

## Additional File 1

### Pre-intervention focus group discussion guide for women (English)

#### Pre Intervention Focus Group Guide – Women

- **Probe Question:** How do you know when you're pregnant?

**Notes:** \_\_\_\_\_  
\_\_\_\_\_  
\_\_\_\_\_  
\_\_\_\_\_

- **Follow-up Questions:** When would you use urine pregnancy test kits?

**Notes:** \_\_\_\_\_  
\_\_\_\_\_  
\_\_\_\_\_  
\_\_\_\_\_

Where would you get it from?

**Notes:** \_\_\_\_\_  
\_\_\_\_\_  
\_\_\_\_\_  
\_\_\_\_\_

What difficulties do you have in getting or using the kits?

**Notes:** \_\_\_\_\_  
\_\_\_\_\_  
\_\_\_\_\_  
\_\_\_\_\_

What do you think about getting it from a CHV?

**Notes:** \_\_\_\_\_  
\_\_\_\_\_  
\_\_\_\_\_  
\_\_\_\_\_

What would be the benefits to getting it from a CHV?

**Notes:** \_\_\_\_\_  
\_\_\_\_\_  
\_\_\_\_\_  
\_\_\_\_\_

What would be the drawbacks to getting it from a CHV?

## Additional File 1

### Pre-intervention focus group discussion guide for women (English)

Notes: \_\_\_\_\_  
\_\_\_\_\_  
\_\_\_\_\_  
\_\_\_\_\_

- **Probe Question:** How do you know what to do if the test is positive?

Notes: \_\_\_\_\_  
\_\_\_\_\_  
\_\_\_\_\_  
\_\_\_\_\_

- **Follow-up Questions:** Where would you go if you had a positive pregnancy test?

Notes: \_\_\_\_\_  
\_\_\_\_\_  
\_\_\_\_\_  
\_\_\_\_\_

What would you do if you were unhappy about being pregnant?

Notes: \_\_\_\_\_  
\_\_\_\_\_  
\_\_\_\_\_  
\_\_\_\_\_

At what point in pregnancy would you go to a health centre?

Notes: \_\_\_\_\_  
\_\_\_\_\_  
\_\_\_\_\_  
\_\_\_\_\_

What would be the benefits to going for ANC early in your pregnancy?

Notes: \_\_\_\_\_  
\_\_\_\_\_  
\_\_\_\_\_  
\_\_\_\_\_

What do you think about getting counselling and referral from a CHV?

Notes: \_\_\_\_\_  
\_\_\_\_\_  
\_\_\_\_\_

## Additional File 1

### Pre-intervention focus group discussion guide for women (English)

---

---

What do you think about getting counselling and referral by private SMS or phone call?

**Notes:** \_\_\_\_\_

---

---

---

---

- **Probe Question:** What would you do if the test was negative and you did not want to be pregnant?

**Notes:** \_\_\_\_\_

---

---

---

---

- **Follow-up Questions:** Would you seek out family planning?

**Notes:** \_\_\_\_\_

---

---

---

---

Where would you go for family planning?

**Notes:** \_\_\_\_\_

---

---

---

---

What difficulties would you face in getting family planning?

**Notes:** \_\_\_\_\_

---

---

---

---

What do you think about getting FP counselling and referral to FP clinic from a CHV?

**Notes:** \_\_\_\_\_

---

---



## Additional File 1

### Pre-intervention focus group discussion guide for women (English)

---

---

What do you think about getting counselling and referral by private SMS or phone call?

**Notes:** \_\_\_\_\_

---

---

---

---

- **Exit Questions:** Is there anything else you want us to know about receiving urine pregnancy test kits from CHVs?

**Notes:** \_\_\_\_\_

---

---

---

---

Is there anything else you want us to know about receiving counselling and referral from CHVs?

**Notes:** \_\_\_\_\_

---

---

---

---

Is there anything else you want us to know about receiving counselling and referral from private SMS or phone call?

**Notes:** \_\_\_\_\_

---

---

---

---

**Additional File 1**

**Pre-intervention focus group discussion guide for men (English)**

**Pre Intervention Focus Group Guide – Men**

- **Probe Question:** How do you know when your wife is pregnant?

**Notes:** \_\_\_\_\_  
\_\_\_\_\_  
\_\_\_\_\_  
\_\_\_\_\_

- **Follow-up question:** Do you know what a urine pregnancy test kit is?

**Notes:** \_\_\_\_\_  
\_\_\_\_\_  
\_\_\_\_\_  
\_\_\_\_\_

Does your wife use the urine pregnancy test kit?

**Notes:** \_\_\_\_\_  
\_\_\_\_\_  
\_\_\_\_\_  
\_\_\_\_\_

(If Yes) When would she use a urine pregnancy test kit?

What is the reason why she would use it?

**Notes:** \_\_\_\_\_  
\_\_\_\_\_  
\_\_\_\_\_  
\_\_\_\_\_

(If No) What is the reason why she wouldn't use?

**Notes:** \_\_\_\_\_  
\_\_\_\_\_  
\_\_\_\_\_  
\_\_\_\_\_

What is your perception about the use of Urine pregnancy test kit?

**Notes:** \_\_\_\_\_  
\_\_\_\_\_  
\_\_\_\_\_  
\_\_\_\_\_

## Additional File 1

### Pre-intervention focus group discussion guide for men (English)

What is the perception of men in this community about a CHV?

Notes: \_\_\_\_\_  
\_\_\_\_\_  
\_\_\_\_\_  
\_\_\_\_\_

What is the perception of men in this community about a CHV offering services to their women?

Notes: \_\_\_\_\_  
\_\_\_\_\_  
\_\_\_\_\_  
\_\_\_\_\_

What is the perception of men in this community regarding CHVs /healthcare workers on the issue of confidentiality when offering services to their wives and members of the community?

Notes: \_\_\_\_\_  
\_\_\_\_\_  
\_\_\_\_\_  
\_\_\_\_\_

What benefits do you receive from the CHVs?

Notes: \_\_\_\_\_  
\_\_\_\_\_  
\_\_\_\_\_  
\_\_\_\_\_

What difficulties do you have with CHVs?

Notes: \_\_\_\_\_  
\_\_\_\_\_  
\_\_\_\_\_  
\_\_\_\_\_

What would be the benefits of getting the kit from a CHV?

Notes: \_\_\_\_\_  
\_\_\_\_\_  
\_\_\_\_\_  
\_\_\_\_\_

What would be the drawbacks of getting it from a CHV?

## Additional File 1

### Pre-intervention focus group discussion guide for men (English)

Notes: \_\_\_\_\_  
\_\_\_\_\_  
\_\_\_\_\_  
\_\_\_\_\_

Would you ever consider purchasing a kit for your wife?

Notes: \_\_\_\_\_  
\_\_\_\_\_  
\_\_\_\_\_  
\_\_\_\_\_

Where would you purchase (or get) a urine pregnancy testing kit?

Notes: \_\_\_\_\_  
\_\_\_\_\_  
\_\_\_\_\_  
\_\_\_\_\_

Would your religious beliefs affect your feelings about pregnancy testing?

**(If Yes):** How, Or in what way?. And for family planning?

Notes: \_\_\_\_\_  
\_\_\_\_\_  
\_\_\_\_\_  
\_\_\_\_\_

Would your traditional and cultural beliefs and perceptions affect your feelings about pregnancy testing?

**(If Yes):** How, Or in what way? And for family planning?

Notes: \_\_\_\_\_  
\_\_\_\_\_  
\_\_\_\_\_  
\_\_\_\_\_

- **Probe Question:** What would you do if she tests positive? Or how would you know what to do if her pregnancy test is positive?

Notes: \_\_\_\_\_  
\_\_\_\_\_  
\_\_\_\_\_  
\_\_\_\_\_

## Additional File 1

### Pre-intervention focus group discussion guide for men (English)

- **Follow-up Questions:** Where would you take her if the pregnancy test is positive?

Notes: \_\_\_\_\_  
\_\_\_\_\_  
\_\_\_\_\_  
\_\_\_\_\_

Where would you recommend her to go if her pregnancy test is positive?

Notes: \_\_\_\_\_  
\_\_\_\_\_  
\_\_\_\_\_  
\_\_\_\_\_

What would you do as a couple if you were unhappy about the pregnancy?

Notes: \_\_\_\_\_  
\_\_\_\_\_  
\_\_\_\_\_  
\_\_\_\_\_

Where would go? Or who would you go to?

**(If Yes):** Give reason.

**(If No):** Give reason.

Notes: \_\_\_\_\_  
\_\_\_\_\_  
\_\_\_\_\_  
\_\_\_\_\_

Where would you go for the ANC services?

Notes: \_\_\_\_\_  
\_\_\_\_\_  
\_\_\_\_\_  
\_\_\_\_\_

What would be the unseen difficulties in getting the ANC services?

Notes: \_\_\_\_\_  
\_\_\_\_\_  
\_\_\_\_\_  
\_\_\_\_\_

## Additional File 1

### Pre-intervention focus group discussion guide for men (English)

What are the benefits of getting ANC services?

Notes: \_\_\_\_\_  
\_\_\_\_\_  
\_\_\_\_\_  
\_\_\_\_\_

What are some of the difficulties women face in pregnancy?

Notes: \_\_\_\_\_  
\_\_\_\_\_  
\_\_\_\_\_  
\_\_\_\_\_

What if the pregnancy test is negative...and you don't want another baby? Where would you go or what would you do? Or you do not want another baby?

Notes: \_\_\_\_\_  
\_\_\_\_\_  
\_\_\_\_\_  
\_\_\_\_\_

- **Probe Question:** What is your perception about Family planning and its use?

Notes: \_\_\_\_\_  
\_\_\_\_\_  
\_\_\_\_\_  
\_\_\_\_\_

- **Follow-up Question:** What are the benefits of using FP?

Notes: \_\_\_\_\_  
\_\_\_\_\_  
\_\_\_\_\_  
\_\_\_\_\_

What are the drawbacks or risks of using FP?

Notes: \_\_\_\_\_  
\_\_\_\_\_  
\_\_\_\_\_  
\_\_\_\_\_

What are your feelings about your wife using family planning?

## Additional File 1

### Pre-intervention focus group discussion guide for men (English)

Notes: \_\_\_\_\_  
\_\_\_\_\_  
\_\_\_\_\_  
\_\_\_\_\_

What do the men in your community think about specific FP methods?  
(implants, IUCDs, Depo, condoms, BTL)

Notes: \_\_\_\_\_  
\_\_\_\_\_  
\_\_\_\_\_  
\_\_\_\_\_

- **Probe Question:** Would you accompany your wife to the clinic?

Notes: \_\_\_\_\_  
\_\_\_\_\_  
\_\_\_\_\_  
\_\_\_\_\_

- **Follow-up Question:** What would be the benefits?

Notes: \_\_\_\_\_  
\_\_\_\_\_  
\_\_\_\_\_  
\_\_\_\_\_

What would be the drawbacks?

Notes: \_\_\_\_\_  
\_\_\_\_\_  
\_\_\_\_\_  
\_\_\_\_\_

- **Probe Question:** What do they think about CHV counseling?

Notes: \_\_\_\_\_  
\_\_\_\_\_  
\_\_\_\_\_  
\_\_\_\_\_

- **Follow-up Question:** What do they think about phone-based counseling?

Notes: \_\_\_\_\_  
\_\_\_\_\_  
\_\_\_\_\_

## Additional File 1

### Pre-intervention focus group discussion guide for men (English)

---

---

Is there any other thing you want us to know about UPT, its use and CHV providing it to your wives?

**Notes:** \_\_\_\_\_

---

---

---

---

- **Exit question:** Explain the intervention we are planning (CUPTs)-ask what their opinions of this program?

**Notes:** \_\_\_\_\_

---

---

---

---

What are some benefits of this program?

**Notes:** \_\_\_\_\_

---

---

---

---

What are some risks/drawbacks?

**Notes:** \_\_\_\_\_

---

---

---

---

What should we exempt from this program?

**Notes:** \_\_\_\_\_

---

---

---

---

What are your recommendations for the program in future?

**Notes:** \_\_\_\_\_

---

---

---

---



## Additional File 1

### Post-intervention focus group discussion guide for Community Health Volunteers (English)

#### Post Intervention Focus Group Guide – Community Health Volunteers

- **Probe Question:** How was your experience in providing urine pregnancy test kits?

**Notes:** \_\_\_\_\_  
\_\_\_\_\_  
\_\_\_\_\_  
\_\_\_\_\_

- **Follow-up Questions:** How comfortable did you feel providing urine pregnancy kits?

**Notes:** \_\_\_\_\_  
\_\_\_\_\_  
\_\_\_\_\_  
\_\_\_\_\_

What are some examples of when you felt uncomfortable (*or did not feel comfortable*) providing urine pregnancy kits?

**Notes:** \_\_\_\_\_  
\_\_\_\_\_  
\_\_\_\_\_  
\_\_\_\_\_

Why do you think there were no participants who reported being raped?

**Notes:** \_\_\_\_\_  
\_\_\_\_\_  
\_\_\_\_\_  
\_\_\_\_\_

What benefits did you experience in providing urine pregnant kits?

**Notes:** \_\_\_\_\_  
\_\_\_\_\_  
\_\_\_\_\_  
\_\_\_\_\_

What benefits did the women experience?

**Notes:** \_\_\_\_\_  
\_\_\_\_\_  
\_\_\_\_\_

## Additional File 1

### Post-intervention focus group discussion guide for Community Health Volunteers (English)

---

---

What difficulties did you face in providing urine pregnancy kits?

Notes: \_\_\_\_\_

---

---

---

---

What difficulties did the women face?

Notes: \_\_\_\_\_

---

---

---

---

Would you want to continue providing urine pregnancy test kits? Why or why not?

Notes: \_\_\_\_\_

---

---

---

---

- **Probe Question:** How was your experience in counseling & referring women about what to do if they have a positive pregnant test?

Notes: \_\_\_\_\_

---

---

---

---

- **Follow-up Questions:** How comfortable did you feel about counseling & referring women about what to do if they have a positive pregnancy test?

Notes: \_\_\_\_\_

---

---

---

---

How comfortable did you feel counseling & referring women who were unhappy about being pregnant?

Notes: \_\_\_\_\_

---

---

---

---

## Additional File 1

### Post-intervention focus group discussion guide for Community Health Volunteers (English)

How was your experience counseling & referring women who said they wanted an abortion?

Notes: \_\_\_\_\_  
\_\_\_\_\_  
\_\_\_\_\_  
\_\_\_\_\_

What benefits did you experience in counseling & referring women with a positive pregnancy test?

Notes: \_\_\_\_\_  
\_\_\_\_\_  
\_\_\_\_\_  
\_\_\_\_\_

What benefits did the women experience?

Notes: \_\_\_\_\_  
\_\_\_\_\_  
\_\_\_\_\_  
\_\_\_\_\_

What difficulties did you face in providing counseling & referral for women with a positive pregnancy test?

Notes: \_\_\_\_\_  
\_\_\_\_\_  
\_\_\_\_\_  
\_\_\_\_\_

What difficulties did the women face?

Notes: \_\_\_\_\_  
\_\_\_\_\_  
\_\_\_\_\_  
\_\_\_\_\_

Would you want to continue providing counseling & referral for women with a positive pregnant test?

Notes: \_\_\_\_\_  
\_\_\_\_\_  
\_\_\_\_\_  
\_\_\_\_\_

- **Probe Question:** How was your experience in counseling & referring women about what to do if they have a negative pregnant test?

## Additional File 1

### Post-intervention focus group discussion guide for Community Health Volunteers (English)

Notes: \_\_\_\_\_  
\_\_\_\_\_  
\_\_\_\_\_  
\_\_\_\_\_

- **Follow-up Questions:** How comfortable did you feel about counseling & referring women about what to do if they have a negative pregnant test?

Notes: \_\_\_\_\_  
\_\_\_\_\_  
\_\_\_\_\_  
\_\_\_\_\_

How comfortable did you feel counseling & referring women who did not want to be pregnant?

Notes: \_\_\_\_\_  
\_\_\_\_\_  
\_\_\_\_\_  
\_\_\_\_\_

How comfortable did you feel counseling & referring women wanted to be pregnant?

Notes: \_\_\_\_\_  
\_\_\_\_\_  
\_\_\_\_\_  
\_\_\_\_\_

What benefits did you experience in counseling & referring women with a negative pregnancy test?

Notes: \_\_\_\_\_  
\_\_\_\_\_  
\_\_\_\_\_  
\_\_\_\_\_

What benefits did the women experience?

Notes: \_\_\_\_\_  
\_\_\_\_\_  
\_\_\_\_\_  
\_\_\_\_\_

What difficulties did you face in providing counseling & referral for women with a negative pregnancy test?

## Additional File 1

### Post-intervention focus group discussion guide for Community Health Volunteers (English)

Notes: \_\_\_\_\_  
\_\_\_\_\_  
\_\_\_\_\_  
\_\_\_\_\_

What difficulties did the women face?

Notes: \_\_\_\_\_  
\_\_\_\_\_  
\_\_\_\_\_  
\_\_\_\_\_

Would you want to continue providing counseling & referral for women with a negative pregnant test?

Notes: \_\_\_\_\_  
\_\_\_\_\_  
\_\_\_\_\_  
\_\_\_\_\_

- **Probe Question:** Was there ever a time when you did not provide post-test counseling and referral?

Notes: \_\_\_\_\_  
\_\_\_\_\_  
\_\_\_\_\_  
\_\_\_\_\_

- **Follow-up questions:** What are some examples of when & why you did not provide post-test counselling?

Notes: \_\_\_\_\_  
\_\_\_\_\_  
\_\_\_\_\_  
\_\_\_\_\_

How did you give women the option of phone-based counseling?

Notes: \_\_\_\_\_  
\_\_\_\_\_  
\_\_\_\_\_  
\_\_\_\_\_

Why do you think participants chose phone-based counselling?

Notes: \_\_\_\_\_  
\_\_\_\_\_  
\_\_\_\_\_

## Additional File 1

### Post-intervention focus group discussion guide for Community Health Volunteers (English)

---

---

Why do you think women who chose phone-based counseling never contacted the RA? Did you provide them with the cards to contact the RA?

**Notes:** \_\_\_\_\_  
\_\_\_\_\_  
\_\_\_\_\_  
\_\_\_\_\_

Did you feel they needed CHV-based counselling in addition to their desired phone-based counselling?

**Notes:** \_\_\_\_\_  
\_\_\_\_\_  
\_\_\_\_\_  
\_\_\_\_\_

- **Exit Questions:** Is there anything else you want us to know about how to change or improve the process for providing urine pregnancy test kits in the future?

**Notes:** \_\_\_\_\_  
\_\_\_\_\_  
\_\_\_\_\_  
\_\_\_\_\_

Is there anything else you want us to know about how to change or improve the process providing counseling and referral for women who are pregnant in the future?

**Notes:** \_\_\_\_\_  
\_\_\_\_\_  
\_\_\_\_\_  
\_\_\_\_\_

Is there anything else you want us to know about how to change or improve the process providing counseling and referral for women who are not pregnant in the future?

**Notes:** \_\_\_\_\_  
\_\_\_\_\_  
\_\_\_\_\_  
\_\_\_\_\_

**Additional File 1**

**Post-intervention focus group discussion guide for Community Health  
Volunteers (English)**
